# Supplementary material for: Automated synthesis of prexasertib and derivatives enabled by continuous-flow solid-phase synthesis
Source: Springer Nature journal article supplement (doi:10.1038/s41557-021-00662-w), 2021-04-19
Supplement: 41557_2021_662_MOESM1_ESM.mol [file 41557_2021_662_MOESM1_ESM.mol]

nchem.20051284C-comp1.mol
  ChemDraw02052119392D

 21 23  0  0  0  0  0  0  0  0999 V2000
    0.5217   -0.8222    0.0000 C   0  0  0  0  0  0  0  0  0  0  0  0
    0.5217   -0.0000    0.0000 C   0  0  0  0  0  0  0  0  0  0  0  0
   -0.3005   -0.0000    0.0000 C   0  0  0  0  0  0  0  0  0  0  0  0
    0.5217    0.8222    0.0000 C   0  0  0  0  0  0  0  0  0  0  0  0
    1.3438   -0.0000    0.0000 Cl  0  0  0  0  0  0  0  0  0  0  0  0
   -0.7130    0.7145    0.0000 C   0  0  0  0  0  0  0  0  0  0  0  0
   -1.5381    0.7145    0.0000 C   0  0  0  0  0  0  0  0  0  0  0  0
   -1.9506   -0.0000    0.0000 C   0  0  0  0  0  0  0  0  0  0  0  0
   -1.5381   -0.7145    0.0000 C   0  0  0  0  0  0  0  0  0  0  0  0
   -0.7130   -0.7145    0.0000 C   0  0  0  0  0  0  0  0  0  0  0  0
   -0.1928   -1.2347    0.0000 C   0  0  0  0  0  0  0  0  0  0  0  0
   -0.1928   -2.0597    0.0000 C   0  0  0  0  0  0  0  0  0  0  0  0
    0.5217   -2.4722    0.0000 C   0  0  0  0  0  0  0  0  0  0  0  0
    1.2361   -2.0597    0.0000 C   0  0  0  0  0  0  0  0  0  0  0  0
    1.2361   -1.2347    0.0000 C   0  0  0  0  0  0  0  0  0  0  0  0
    1.2361    1.2347    0.0000 C   0  0  0  0  0  0  0  0  0  0  0  0
    1.2361    2.0597    0.0000 C   0  0  0  0  0  0  0  0  0  0  0  0
    0.5217    2.4722    0.0000 C   0  0  0  0  0  0  0  0  0  0  0  0
   -0.1928    2.0597    0.0000 C   0  0  0  0  0  0  0  0  0  0  0  0
   -0.1928    1.2347    0.0000 C   0  0  0  0  0  0  0  0  0  0  0  0
    1.9506   -0.8222    0.0000 Cl  0  0  0  0  0  0  0  0  0  0  0  0
  1  2  1  0      
  2  3  1  0      
  2  4  1  0      
  2  5  1  0      
  3  6  2  0      
  6  7  1  0      
  7  8  2  0      
  8  9  1  0      
  9 10  2  0      
 10  3  1  0      
  1 11  2  0      
 11 12  1  0      
 12 13  2  0      
 13 14  1  0      
 14 15  2  0      
 15  1  1  0      
  4 16  2  0      
 16 17  1  0      
 17 18  2  0      
 18 19  1  0      
 19 20  2  0      
 20  4  1  0      
 15 21  1  0      
M  END
