# Supplementary material for: Automated synthesis of prexasertib and derivatives enabled by continuous-flow solid-phase synthesis
Source: Springer Nature journal article supplement (doi:10.1038/s41557-021-00662-w), 2021-04-19
Supplement: 41557_2021_662_MOESM5_ESM.mol [file 41557_2021_662_MOESM5_ESM.mol]

nchem.20051284C-comp3.mol
  ChemDraw02052119492D

 37 40  0  0  0  0  0  0  0  0999 V2000
    0.7197   -0.7918    0.0000 C   0  0  0  0  0  0  0  0  0  0  0  0
    0.0051   -0.3790    0.0000 C   0  0  0  0  0  0  0  0  0  0  0  0
    0.0051    0.4461    0.0000 C   0  0  0  0  0  0  0  0  0  0  0  0
   -0.7090    0.8583    0.0000 O   0  0  0  0  0  0  0  0  0  0  0  0
   -1.4259    0.4443    0.0000 C   0  0  0  0  0  0  0  0  0  0  0  0
   -2.1428    0.8583    0.0000 C   0  0  0  0  0  0  0  0  0  0  0  0
   -2.8597    0.4443    0.0000 C   0  0  0  0  0  0  0  0  0  0  0  0
   -2.8597   -0.3836    0.0000 C   0  0  0  0  0  0  0  0  0  0  0  0
   -2.1428   -0.7975    0.0000 C   0  0  0  0  0  0  0  0  0  0  0  0
   -1.4259   -0.3836    0.0000 C   0  0  0  0  0  0  0  0  0  0  0  0
    4.2903    0.4529    0.0000 C   0  0  0  0  0  0  0  0  0  0  0  0
    2.1469    0.8597    0.0000 Cl  0  0  0  0  0  0  0  0  0  0  0  0
    3.5774   -0.7886    0.0000 C   0  0  0  0  0  0  0  0  0  0  0  0
    4.2913   -0.3749    0.0000 C   0  0  0  0  0  0  0  0  0  0  0  0
    3.5753    0.8612    0.0000 C   0  0  0  0  0  0  0  0  0  0  0  0
    2.8619    0.4481    0.0000 C   0  0  0  0  0  0  0  0  0  0  0  0
    2.8625   -0.3770    0.0000 C   0  0  0  0  0  0  0  0  0  0  0  0
    1.4337   -0.3790    0.0000 N   0  0  0  0  0  0  0  0  0  0  0  0
    2.1487   -0.7906    0.0000 C   0  0  0  0  0  0  0  0  0  0  0  0
    1.6084   -1.5050    0.0000 C   0  0  0  0  0  0  0  0  0  0  0  0
    0.7899   -1.4036    0.0000 C   0  0  0  0  0  0  0  0  0  0  0  0
    0.2923   -2.0616    0.0000 C   0  0  0  0  0  0  0  0  0  0  0  0
    0.6132   -2.8211    0.0000 C   0  0  0  0  0  0  0  0  0  0  0  0
    1.4318   -2.9234    0.0000 C   0  0  0  0  0  0  0  0  0  0  0  0
    1.9294   -2.2653    0.0000 C   0  0  0  0  0  0  0  0  0  0  0  0
    2.7338   -1.5041    0.0000 C   0  0  0  0  0  0  0  0  0  0  0  0
    2.4432   -2.2762    0.0000 C   0  0  0  0  0  0  0  0  0  0  0  0
    2.9660   -2.9137    0.0000 C   0  0  0  0  0  0  0  0  0  0  0  0
    3.7801   -2.7796    0.0000 C   0  0  0  0  0  0  0  0  0  0  0  0
    4.0707   -2.0081    0.0000 C   0  0  0  0  0  0  0  0  0  0  0  0
    3.5478   -1.3700    0.0000 C   0  0  0  0  0  0  0  0  0  0  0  0
   -2.1428    1.6862    0.0000 C   0  0  0  0  0  0  0  0  0  0  0  0
   -2.8574    2.0984    0.0000 O   0  0  0  0  0  0  0  0  0  0  0  0
   -1.4288    2.0984    0.0000 O   0  0  0  0  0  0  0  0  0  0  0  0
   -1.4288    2.9234    0.0000 C   0  0  0  0  0  0  0  0  0  0  0  0
   -3.5767    0.8583    0.0000 O   0  0  0  0  0  0  0  0  0  0  0  0
   -4.2913    0.4461    0.0000 C   0  0  0  0  0  0  0  0  0  0  0  0
 34 35  1  0      
 32 33  2  0      
 32 34  1  0      
  6 32  1  0      
 36 37  1  0      
  7 36  1  0      
 11 15  2  0      
 14 11  1  0      
 16 12  1  0      
 13 17  1  0      
 14 13  2  0      
 16 15  1  0      
 17 16  2  0      
 19 17  1  0      
 19 18  1  0      
 19 20  1  0      
 19 26  1  0      
 18  1  1  0      
  1  2  1  0      
  2  3  1  0      
  3  4  1  0      
  4  5  1  0      
  5  6  2  0      
  6  7  1  0      
  7  8  2  0      
  8  9  1  0      
  9 10  2  0      
 10  5  1  0      
 24 25  2  0      
 23 24  1  0      
 22 23  2  0      
 21 22  1  0      
 20 21  2  0      
 20 25  1  0      
 30 31  2  0      
 29 30  1  0      
 28 29  2  0      
 27 28  1  0      
 26 27  2  0      
 26 31  1  0      
M  STY  1   1 SUP
M  SLB  1   1   1
M  SAL   1  4  32  33  34  35
M  SBL   1  1   4
M  SMT   1 COOMe
M  SBV   1   4    0.0000   -0.8279
M  STY  1   2 SUP
M  SLB  1   2   2
M  SAL   2  2  36  37
M  SBL   2  1   6
M  SMT   2 OMe
M  SBV   2   6    0.7170   -0.4139
M  END
