# Supplementary material for: Automated synthesis of prexasertib and derivatives enabled by continuous-flow solid-phase synthesis
Source: Springer Nature journal article supplement (doi:10.1038/s41557-021-00662-w), 2021-04-19
Supplement: 41557_2021_662_MOESM59_ESM.mol [file 41557_2021_662_MOESM59_ESM.mol]

nchem.20051284C-comp30.mol
  ChemDraw02052119412D

 35 37  0  0  0  0  0  0  0  0999 V2000
   -0.2956    2.5706    0.0000 N   0  0  0  0  0  0  0  0  0  0  0  0
    0.5114    2.7422    0.0000 N   0  0  0  0  0  0  0  0  0  0  0  0
    0.9239    2.0277    0.0000 C   0  0  0  0  0  0  0  0  0  0  0  0
    0.3719    1.4146    0.0000 C   0  0  0  0  0  0  0  0  0  0  0  0
   -0.3818    1.7502    0.0000 C   0  0  0  0  0  0  0  0  0  0  0  0
    1.7444    1.9415    0.0000 N   0  0  0  0  0  0  0  0  0  0  0  0
    2.0800    1.1878    0.0000 C   0  0  0  0  0  0  0  0  0  0  0  0
   -1.0963    1.3377    0.0000 C   0  0  0  0  0  0  0  0  0  0  0  0
   -1.8107    1.7502    0.0000 C   0  0  0  0  0  0  0  0  0  0  0  0
   -2.5252    1.3377    0.0000 C   0  0  0  0  0  0  0  0  0  0  0  0
   -2.5252    0.5127    0.0000 C   0  0  0  0  0  0  0  0  0  0  0  0
   -1.8107    0.1002    0.0000 C   0  0  0  0  0  0  0  0  0  0  0  0
   -1.0963    0.5127    0.0000 C   0  0  0  0  0  0  0  0  0  0  0  0
    1.5950    0.5204    0.0000 C   0  0  0  0  0  0  0  0  0  0  0  0
    1.9306   -0.2333    0.0000 N   0  0  0  0  0  0  0  0  0  0  0  0
    2.7511   -0.3196    0.0000 C   0  0  0  0  0  0  0  0  0  0  0  0
    3.2360    0.3479    0.0000 C   0  0  0  0  0  0  0  0  0  0  0  0
    2.9004    1.1016    0.0000 N   0  0  0  0  0  0  0  0  0  0  0  0
   -3.2397   -0.7248    0.0000 N   0  0  0  0  0  0  0  0  0  0  0  0
   -3.9071   -1.2098    0.0000 N   0  0  0  0  0  0  0  0  0  0  0  0
   -3.6522   -1.9944    0.0000 N   0  0  0  0  0  0  0  0  0  0  0  0
   -2.8272   -1.9944    0.0000 C   0  0  0  0  0  0  0  0  0  0  0  0
   -2.5722   -1.2098    0.0000 C   0  0  0  0  0  0  0  0  0  0  0  0
   -2.3422   -2.6618    0.0000 C   0  0  0  0  0  0  0  0  0  0  0  0
   -1.5218   -2.5756    0.0000 N   0  3  0  0  0  0  0  0  0  0  0  0
   -3.2397    0.1002    0.0000 C   0  0  0  0  0  0  0  0  0  0  0  0
    3.0866   -1.0732    0.0000 C   0  0  0  0  0  0  0  0  0  0  0  0
    3.9071   -1.1595    0.0000 N   0  0  0  0  0  0  0  0  0  0  0  0
    1.2709   -1.5004    0.0000 C   0  0  0  0  0  0  0  0  0  0  0  0
    0.5539   -1.9143    0.0000 C   0  0  0  0  0  0  0  0  0  0  0  0
    1.2709   -0.6725    0.0000 O   0  0  0  0  0  0  0  0  0  0  0  0
    1.9878   -1.9143    0.0000 O   0  5  0  0  0  0  0  0  0  0  0  0
   -0.1630   -2.3282    0.0000 F   0  0  0  0  0  0  0  0  0  0  0  0
    0.5539   -2.7422    0.0000 F   0  0  0  0  0  0  0  0  0  0  0  0
   -0.1630   -1.5004    0.0000 F   0  0  0  0  0  0  0  0  0  0  0  0
 27 28  3  0      
 16 27  1  0      
  1  2  1  0      
  2  3  2  0      
  3  4  1  0      
  4  5  2  0      
  5  1  1  0      
  3  6  1  0      
  8  9  2  0      
  9 10  1  0      
 10 11  2  0      
 11 12  1  0      
 12 13  2  0      
 13  8  1  0      
  8  5  1  0      
  6  7  1  0      
  7 14  2  0      
 14 15  1  0      
 15 16  2  0      
 16 17  1  0      
 17 18  2  0      
 18  7  1  0      
 19 20  1  0      
 20 21  2  0      
 21 22  1  0      
 22 23  2  0      
 23 19  1  0      
 22 24  1  0      
 24 25  1  0      
 11 26  1  0      
 26 19  1  0      
 29 30  1  0      
 29 31  2  0      
 29 32  1  0      
 30 33  1  0      
 30 34  1  0      
 30 35  1  0      
M  CHG  2  25   1  32  -1
M  STY  1   1 SUP
M  SLB  1   1   1
M  SAL   1  2  27  28
M  SBL   1  1   2
M  SMT   1 CN
M  SBV   1   2   -0.3356    0.7537
M  END
